# Supplementary material
Source: publisher figshare collection journal article supplement (https://acs.figshare.com/ndownloader/files/15433112)
Supplement: Supplementary file 1 [file 15433112]

# Supporting Information

## Nucleation and Conversion Transformations of the Transition Metal Polysulfide VS<sub>4</sub> in Lithium Ion Batteries

Ruqian Lian<sup>†</sup>, Jianrui Feng<sup>‡</sup>, Dashuai Wang<sup>†</sup>, Qifeng Yang<sup>†</sup>, Dongxiao Kan<sup>†</sup>, Muhammad Mamoor<sup>†</sup>,  
Gang Chen<sup>†</sup>, Yingjin Wei<sup>†,\*</sup>

<sup>†</sup>Key Laboratory of Physics and Technology for Advanced Batteries (Ministry of Education), College of Physics, Jilin University, Changchun 130012, China.

<sup>‡</sup>Department of Chemistry, Zhejiang University, Hangzhou 310027, China.

### AUTHOR INFORMATION

#### Corresponding Author

\* E-mail: yjwei@jlu.edu.cn

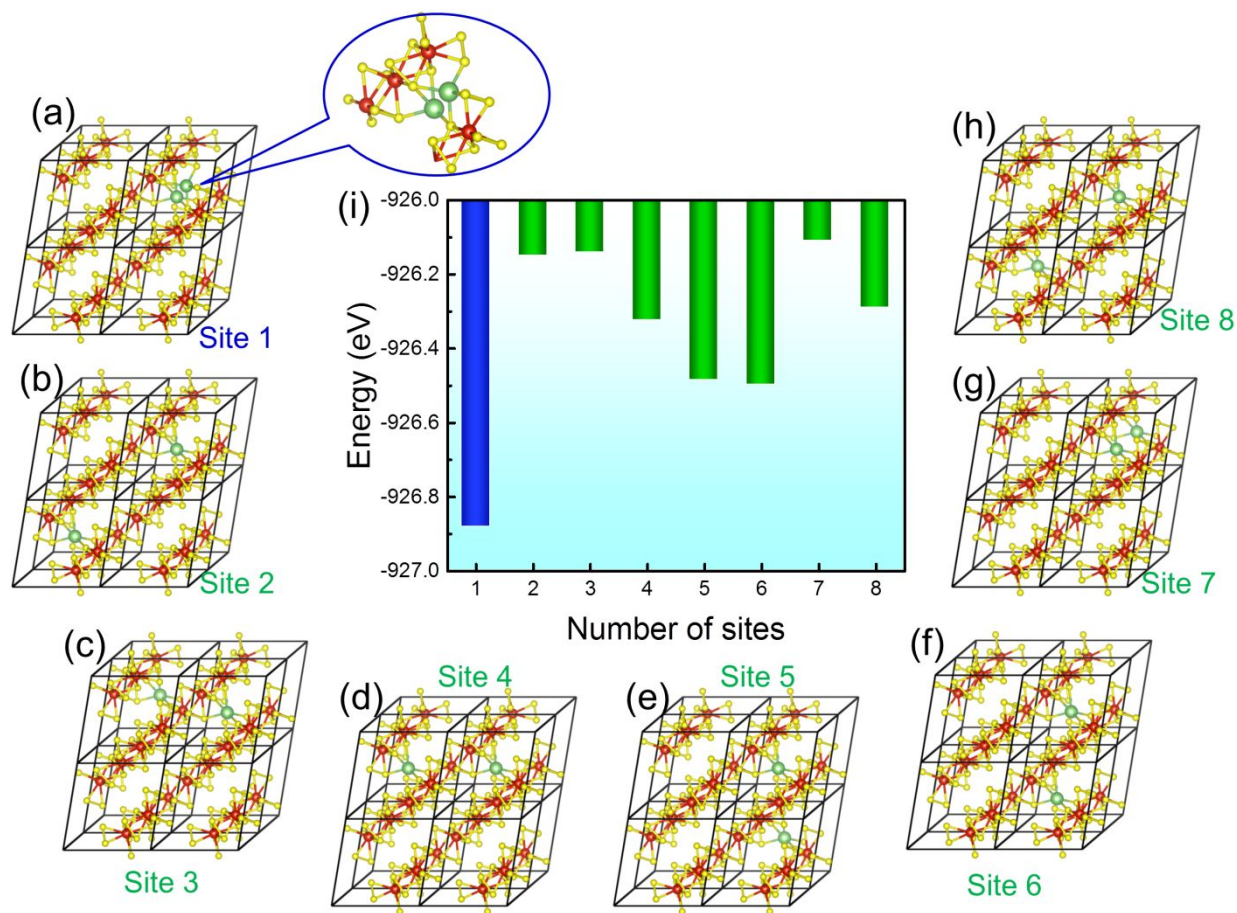

**Fig. S1.** The structures of a  $2 \times 2 \times 2$   $\text{VS}_4$  supercell with two Li atoms inserted in (a) a single unit cell; (b-h) different unit cells. (i) The total energy of these configurations. It showed that the aggregation model (Site 1) was indeed energetically favored.

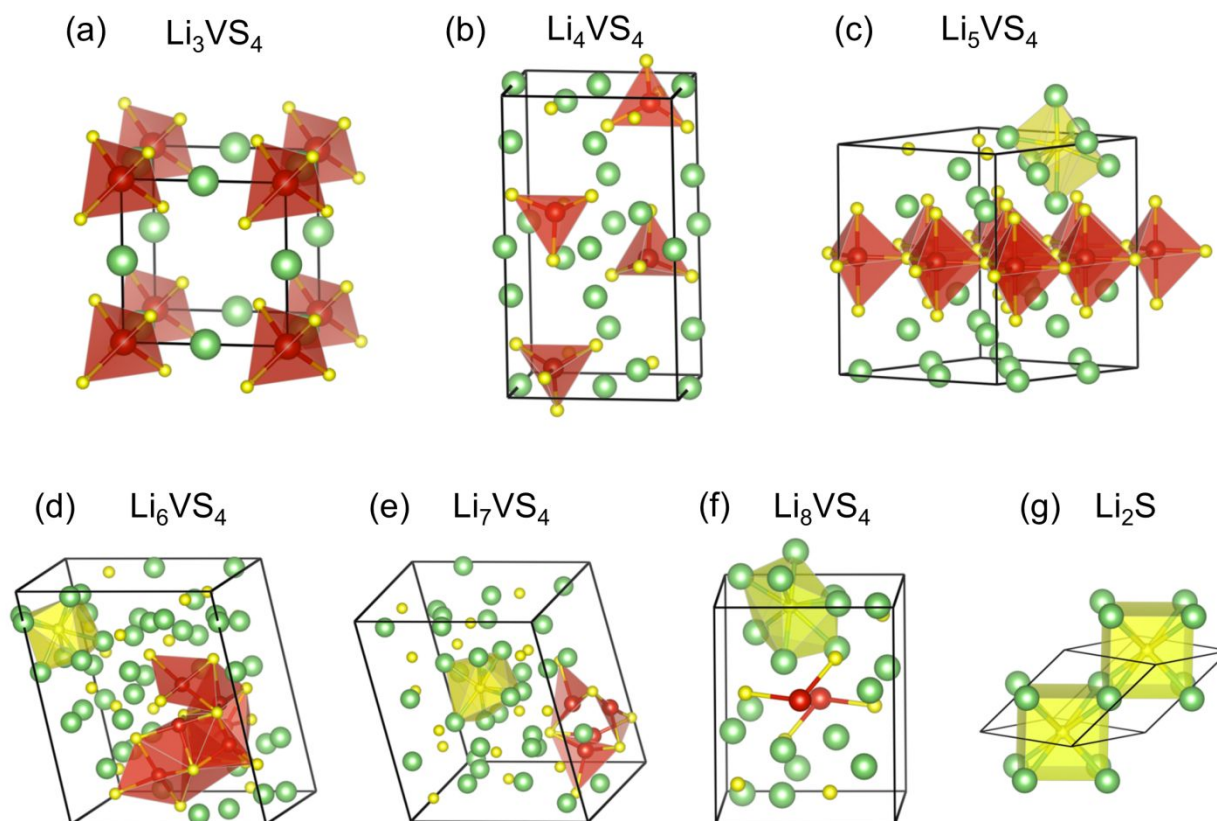

**Fig. S2.** (a-f) The predicted structures of  $\text{Li}_x\text{VS}_4$  ( $3 \leq x \leq 8$ ). (g) The crystal structure of  $\text{Li}_2\text{S}$ . It can be seen that the  $\text{Li}_8\text{S}$  cluster (yellow) formed in  $\text{Li}_x\text{VS}_4$  ( $5 \leq x \leq 8$ ) was different from the  $\text{Li}_8\text{S}$  unit in  $\text{Li}_2\text{S}$  crystal.

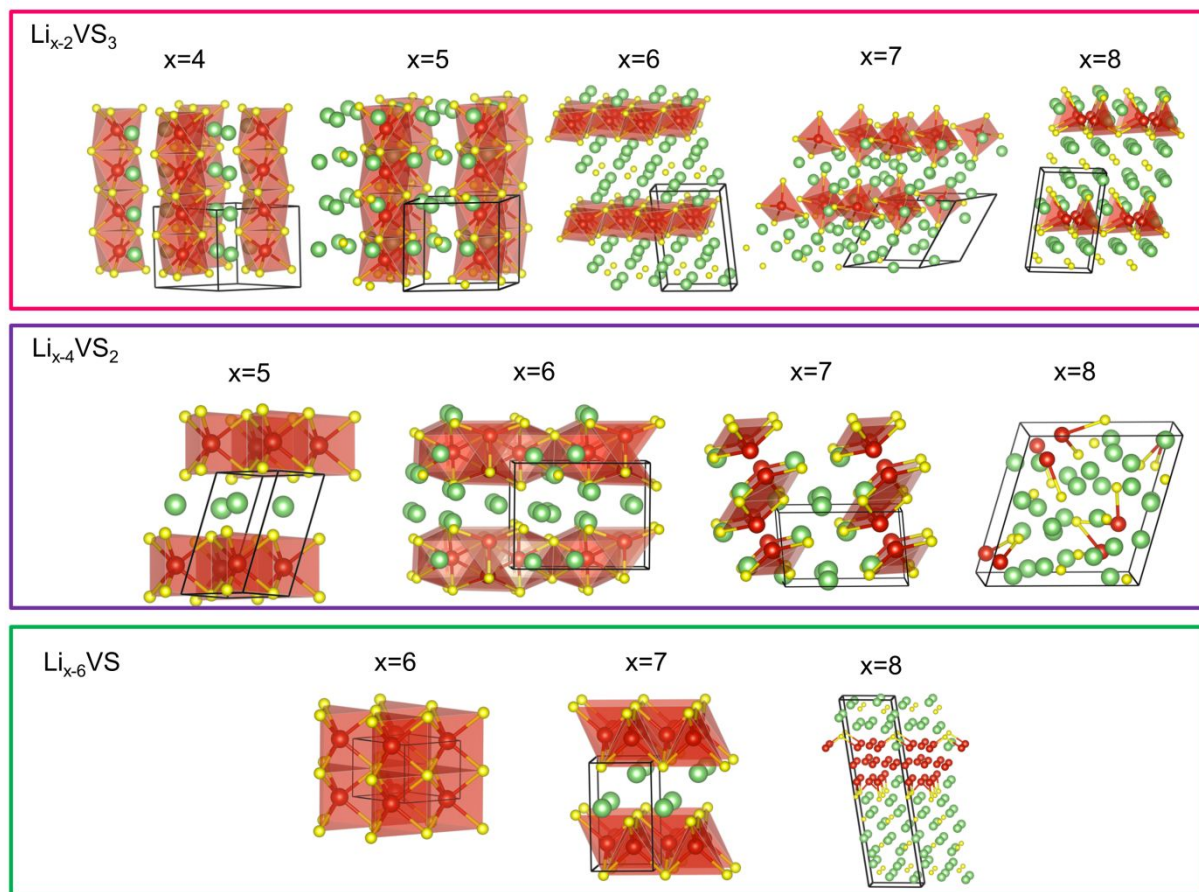

**Fig. S3.** The predicted structures of  $\text{Li}_{x-2}\text{VS}_3$ ,  $\text{Li}_{x-4}\text{VS}_2$  and  $\text{Li}_{x-6}\text{VS}$  ( $3 \leq x \leq 8$ ).

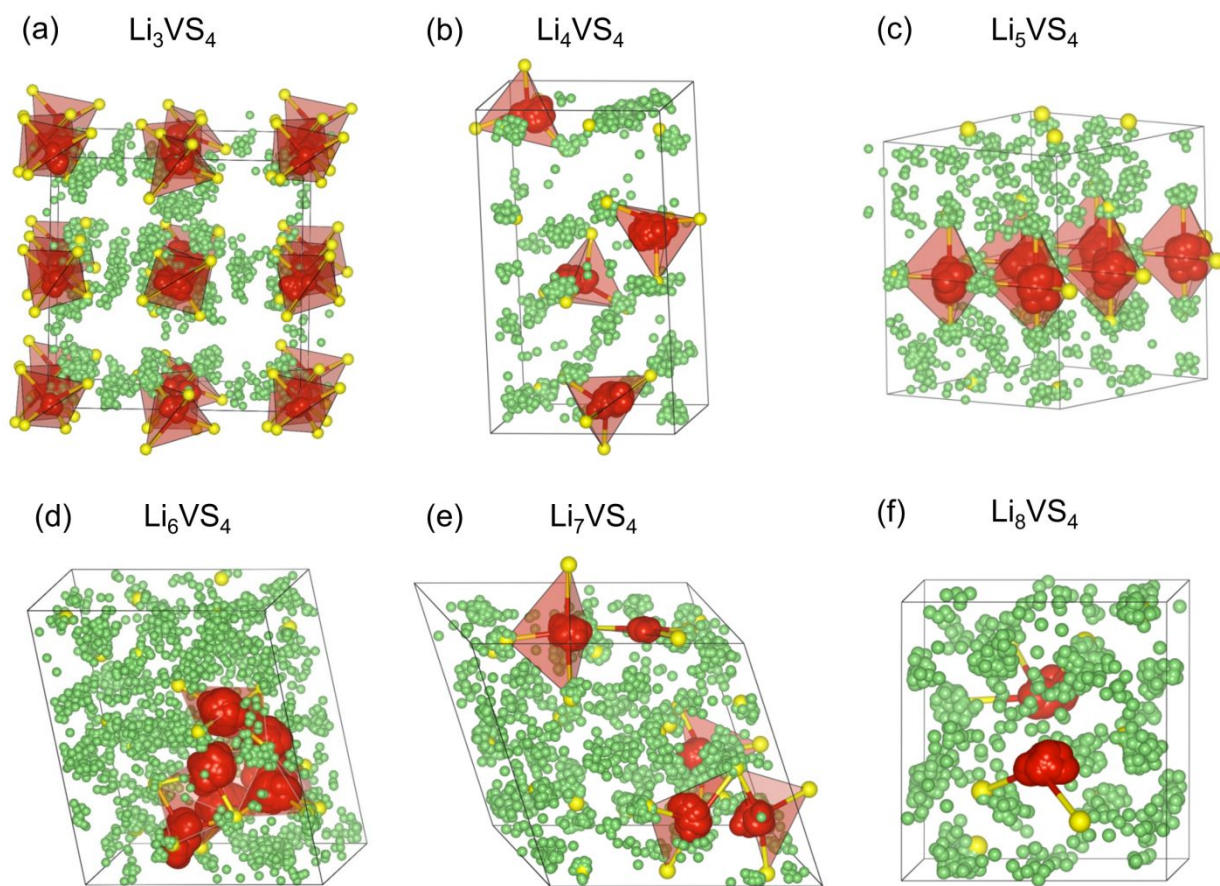

**Fig. S4.** The trace of  $\text{Li}^+$  diffusion in the (a)  $\text{Li}_3\text{VS}_4$ , (b)  $\text{Li}_4\text{VS}_4$ , (c)  $\text{Li}_5\text{VS}_4$ , (d)  $\text{Li}_6\text{VS}_4$ , (e)  $\text{Li}_7\text{VS}_4$ , (f)  $\text{Li}_8\text{VS}_4$  structure at 800K.
